# Supplementary material
Source: PubMed Central journal article supplement (PMC524350)

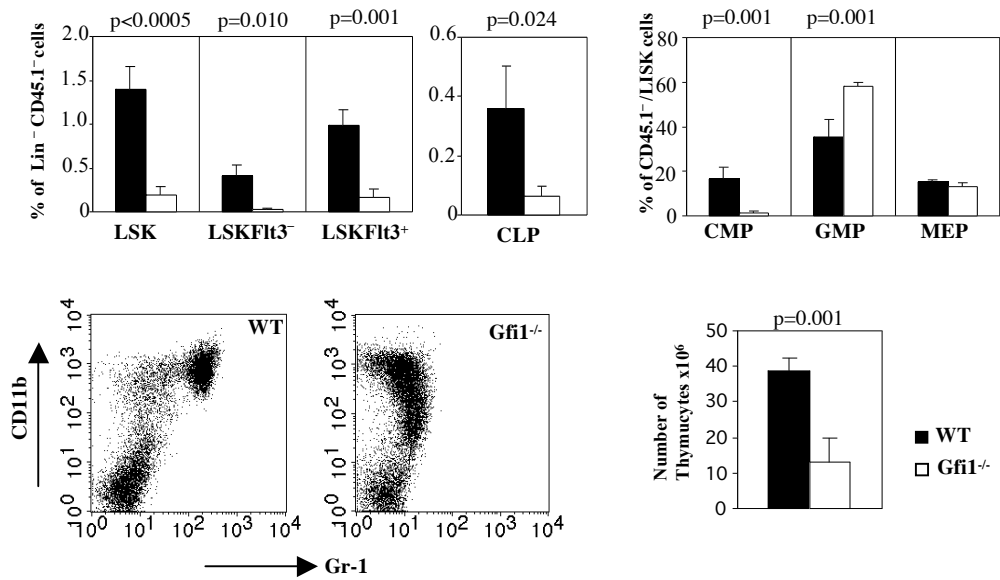

**Supplementary  
Figure 1  
Zeng et al.**

Supplement: 7600419s1.pdf [file 7600419s1.pdf]

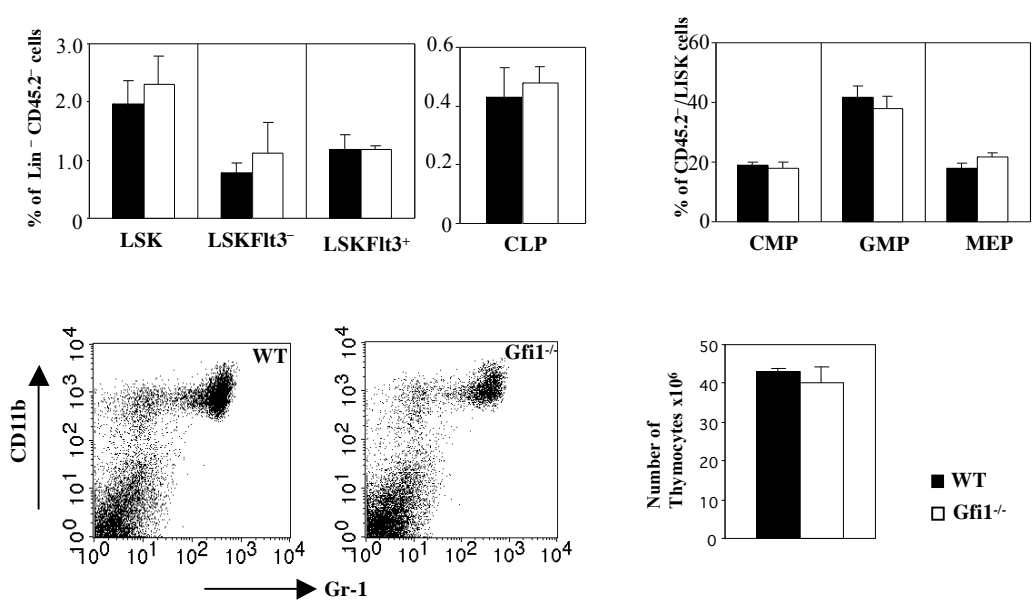

**Supplementary  
Figure 2  
Zeng et al.**

Supplement: 7600419s2.pdf [file 7600419s2.pdf]

**LSK**

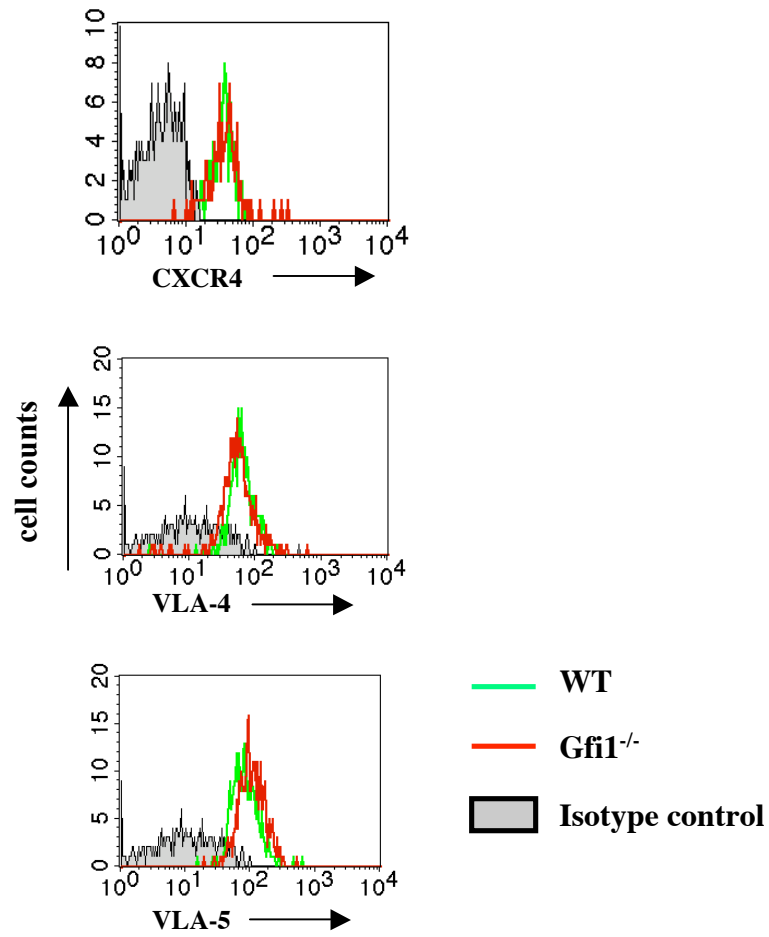

**Supplementary  
Figure 3  
Zeng et al.**

Supplement: 7600419s3.pdf [file 7600419s3.pdf]
